# Supplementary material for: Mental Health Conditions Among Children and Adolescents With Congenital Heart Disease: A Danish Population-Based Cohort Study
Source: PubMed Central journal article supplement — Circulation. 2023 Sep 18;148(18):1381–94. doi: 10.1161/CIRCULATIONAHA.123.064705 (PMC10615360; doi:10.1161/circulationaha.123.064705), 2023-09-18
Supplement: cir-148-1381-s001.pdf [file cir-148-1381-s001.pdf]

**Supplementary Material**

Table S1. CHD ICD-10 codes, grouped by complexity.

| Mild/Moderate CHD*                        | ICD-10 code   | n (%)        |
|-------------------------------------------|---------------|--------------|
| Atrial septal defect                      | Q211, Q211A-C | 4281 (26.0%) |
| Bicuspid aortic valve                     | Q231A         | 67 (0.4%)    |
| Coarctation of the aorta                  | Q251, Q251A   | 481 (2.9%)   |
| Congenital aortic stenosis                | Q230          | 279 (1.7%)   |
| Congenital aortic insufficiency           | Q231          | 196 (1.2%)   |
| Congenital mitral insufficiency           | Q233          | 328 (2.0%)   |
| Congenital mitral stenosis                | Q232          | 20 (0.1%)    |
| Congenital pulmonary valve insufficiency  | Q222          | 12 (0.1%)    |
| Congenital stenosis of vena cava          | Q26, Q260     | 5-8 (0%)     |
| Congenital subaortic stenosis             | Q244          | 67 (0.4%)    |
| Congenital tricuspid stenosis             | Q224          | 7 (0%)       |
| Cor triatriatum                           | Q242          | 1-4 (0%)     |
| Double aortic arch                        | Q254E         | 20 (0.1%)    |
| Malformation of coronary vessels          | Q245          | 31 (0.2%)    |
| Partial anomalous pulmonary venous return | Q263          | 13 (0.1%)    |
| Patent ductus arteriosus                  | Q250          | 1,193 (7.2%) |
| Persistent LSVC (in isolation)            | Q261          | 31 (0.2%)    |
| Pulmonary artery stenosis                 | Q256          | 408 (2.5%)   |
| Pulmonary infundibular stenosis           | Q243          | 17 (0.1%)    |
| Pulmonary stenosis                        | Q221          | 765 (4.6%)   |
| Supravalvar aortic stenosis               | Q253          | 40 (0.2%)    |
| Ventricular septal defect                 | Q210          | 4038 (24.5%) |

| Severe CHD                               | ICD-10 code   | n (%)      |
|------------------------------------------|---------------|------------|
| Aortopulmonary septal defect             | Q214          | 9 (0.1%)   |
| Atrioventricular septal defect           | Q212          | 456 (2.8%) |
| Congenital heart block                   | Q246          | 36 (0.2%)  |
| Discordant atrioventricular connection   | Q205, Q205A-B | 16 (0.4%)  |
| Discordant ventriculoarterial connection | Q203, Q203A   | 212 (1.3%) |
| Double-outlet right ventricle            | Q201          | 58 (0.3%)  |
| Ebstein anomaly                          | Q225          | 37 (9.2%)  |
| Pulmonary valve atresia                  | Q220, Q220A   | 37 (0.2%)  |
| Total anomalous pulmonary venous return  | Q262          | 17 (0.1%)  |
| Tetralogy of Fallot                      | Q213, Q213A   | 274 (1.7%) |
| Truncus arteriosus                       | Q200          | 41 (0.2%)  |

| Single ventricle CHD             | ICD-10 code | n (%)     |
|----------------------------------|-------------|-----------|
| Aortic atresia                   | Q252        | 11 (0.1%) |
| Double-inlet left ventricle      | Q204        | 26 (0.2%) |
| Hypoplastic left heart syndrome  | Q234        | 42 (0.3%) |
| Hypoplastic right heart syndrome | Q226        | 21 (0.1%) |
| Pulmonary atresia                | Q255        | 14 (0.1%) |

| Other                                                          | ICD-10 code | n (%)        |
|----------------------------------------------------------------|-------------|--------------|
| Anomalous pulmonary venous connection                          | Q264        | 32 (0.2%)    |
| Congenital malformation of aortic and mitral valves            | Q239        | 19 (0.1%)    |
| Congenital malformation of cardiac chambers and connections    | Q209        | 109 (0.7%)   |
| Congenital malformation of cardiac septum                      | Q219        | 94 (0.6%)    |
| Congenital malformation of great arteries                      | Q259        | 23 (0.1%)    |
| Congenital malformation of great vein                          | Q269        | 18 (0.1%)    |
| Congenital malformation of heart                               | Q249        | 1966 (11.9%) |
| Congenital malformation of tricuspid valve                     | Q229        | 5 (0.0%)     |
| Other congenital malformation of cardiac septa                 | Q218A-C     | 1 (0.0%)     |
| Other congenital malformations of aortic and mitral valves     | Q238        | 141 (0.8%)   |
| Other congenital malformations of cardiac chambers/connections | Q208A-C,E   | 11 (0.1%)    |
| Other congenital malformations of cardiac septa                | Q218        | 25 (0.2%)    |
| Other congenital malformations of great veins                  | Q268A,C-D   | 22 (0.1%)    |
| Other congenital malformations of other great arteries         | Q258        | 45 (0.3%)    |
| Other congenital malformations of pulmonary artery             | Q257        | 41 (0.2%)    |
| Other congenital malformations of pulmonary valve              | Q223        | 12 (0.1%)    |
| Other congenital malformations of the aorta                    | Q254        | 101 (0.6%)   |
| Other congenital malformations of tricuspid valve              | Q228        | 43 (0.3%)    |
| Other specified congenital malformations of heart              | Q248A-K     | 152 (0.9%)   |

Table S1 lists the CHD diagnoses, corresponding ICD-10 codes, and number of subjects (n (%)) identified in the Danish National Patient Registry. CHD complexity was categorized into 5 groups: (1) mild CHD, defined as all simple congenital heart anomalies not requiring intervention in the first year of life; (2) moderate CHD, defined as simple biventricular malformations requiring surgical or catheter-based intervention (*e.g.*, atrial septal defects, ventricular septal

defects, coarctation of the aorta, and patent ductus arteriosus); (3) severe CHD, defined as significantly malformed but biventricular heart defects requiring surgery in the first year of life (*e.g.*, tetralogy of Fallot, transposition of the great arteries, atrioventricular canal defects); (4) single-ventricle CHD (*e.g.*, hypoplastic left heart syndrome); and (5) other (*e.g.*, unspecified malformations of cardiac chambers, septa, or valves).<sup>21,22</sup> Interventions were identified from Danish Classification of Surgical Procedures and Therapies codes 30-33 and Nordic Medico-Statistical Committee Classification of Surgical Procedure code KF.<sup>22</sup>

Abbreviations: *CHD* = congenital heart disease; *ICD-10* = International Classification of Diseases, Tenth Revision

**Table S2. Codes utilized for major congenital anomalies, psychotropic medications, and psychotherapy encounters.**

|                                                   |                                                                                                                                                                                                                                                                                                                                                                                                                                                                                                                                                                                                                                                                                                                                                                                                                                                                                                                                                                    |
|---------------------------------------------------|--------------------------------------------------------------------------------------------------------------------------------------------------------------------------------------------------------------------------------------------------------------------------------------------------------------------------------------------------------------------------------------------------------------------------------------------------------------------------------------------------------------------------------------------------------------------------------------------------------------------------------------------------------------------------------------------------------------------------------------------------------------------------------------------------------------------------------------------------------------------------------------------------------------------------------------------------------------------|
| <b>Major congenital anomalies</b>                 | <p>All ICD-10 Q codes were included in addition to D215, D1810, P350, P351, and P371.</p> <p><i>Minor congenital anomalies were excluded*: Q671, Q674, Q672, Q189, Q670, Q673, Q753, Q135, Q101, Q102, Q752, Q103, Q105, Q170, Q171, Q172, Q173, Q174, Q175, Q179, Q180, Q181, Q182, Q189, Q385, Q186, Q382, Q184, Q187, Q185, Q674, Q381, Q189, Q680, Q740G, Q845, Q8280, Q653-656, Q668, Q669, Q665, Q845, Q663, Q666, Q662, Q667, Q664, Q833, Q825, Q766, Q765, Q683, Q684, Q685, Q675, Q764L, Q676, Q682A, Q677, Q678, Q760, Q767C, Q270, Q250 (if GA &lt; 37 weeks), Q211C, Q256 (if GA &lt; 37 weeks), Q261, Q254E, Q331, Q314, Q315, Q320, Q401, Q430, Q400, Q633, Q610, Q627, Q552F, Q527, Q525, Q523, Q552, Q53, Q899, Q950, Q951</i></p> <p><i>*Q53 and Q65 were specifically excluded due to poor validity in Danish National Patient Registry</i></p> <p><b>Genetic syndromes:</b> Q447B, Q619A, Q751, Q754, Q87, Q936, D821; Q90-Q92; Q93, Q96-99</p> |
| <b>Psychotropic medications</b>                   | <p><u>WHO Anatomical Therapeutic Chemical codes:</u></p> <ul style="list-style-type: none"> <li>• Antipsychotics (NO5A)</li> <li>• Anxiolytics (NO5B)</li> <li>• Hypnotics/sedatives (NO5C)</li> <li>• Antidepressants (N06A and N06C)</li> <li>• Stimulants (NO6B).</li> </ul>                                                                                                                                                                                                                                                                                                                                                                                                                                                                                                                                                                                                                                                                                    |
| <b>Community-based psychotherapeutic services</b> | <p><u>Health insurance codes:</u></p> <ul style="list-style-type: none"> <li>• General practitioner encounters for mental health concerns: 804003, 804021-027, 804094-095, 804106, and 806101</li> <li>• Psychologist encounters: 63xxxx</li> <li>• Psychiatrist encounters: 24xxxx, 26xxxx</li> </ul>                                                                                                                                                                                                                                                                                                                                                                                                                                                                                                                                                                                                                                                             |

Major congenital anomalies (MCAs) including genetic syndromes were identified using ICD-10 codes according to the EUROCAT categorization system. This Table was modeled after the work of Rotberg *et al.*<sup>25</sup> The World Health Organization (WHO) Anatomical Therapeutic Chemical code system was used to identify relevant psychotropic medications. Lastly, mental health-related encounters were identified in the National Health Insurance Service Registry using health insurance codes associated with a general practitioner visit for mental health concerns, psychotherapy encounters with a psychologist, and any visit to a psychiatrist.

Table S3. Parental socioeconomic and health characteristics for the CHD cohort and the three comparison cohorts.

|                                    | CHD cohort<br><i>n</i><br>16,473 | General<br>population<br>cohort<br>162,204 | Sibling cohort<br>20,079 | MCA cohort<br>47,799 |                                             | CHD cohort<br>16,473 | General<br>population<br>cohort<br>162,204 | Sibling cohort<br>20,079 | MCA cohort<br>47,799 |
|------------------------------------|----------------------------------|--------------------------------------------|--------------------------|----------------------|---------------------------------------------|----------------------|--------------------------------------------|--------------------------|----------------------|
| <b>Maternal socioeconomic data</b> |                                  |                                            |                          |                      | <b>Paternal socioeconomic data, cont'd.</b> |                      |                                            |                          |                      |
| Age (years)                        | 32.2 ± 5.9                       | 32.1 ± 5.7                                 | 32.1 ± 5.5               | 32.1 ± 5.7           | <b>Income</b>                               |                      |                                            |                          |                      |
| <b>Education</b>                   |                                  |                                            |                          |                      | Lowest quartile                             | 2,512 (15.2%)        | 23,806 (14.7%)                             | 3,453 (17.2%)            | 7,342 (15.4%)        |
| High school                        | 5,280 (32.1%)                    | 48,001 (29.6%)                             | 7,146 (35.6%)            | 14,682 (30.7%)       | Low-middle quartile                         | 3,907 (23.7%)        | 36,579 (22.6%)                             | 4,904 (24.4%)            | 11,012 (23.0%)       |
| Technical school                   | 5,676 (34.5%)                    | 54,831 (33.8%)                             | 6,765 (33.7%)            | 16,151 (33.8%)       | High-middle quartile                        | 4,585 (27.8%)        | 45,619 (28.1%)                             | 5,435 (27.1%)            | 13,134 (27.5%)       |
| College degree                     | 4,808 (29.2%)                    | 52,242 (32.2%)                             | 5,520 (27.5%)            | 14,836 (31%)         | Highest quartile                            | 4,985 (30.3%)        | 52,327 (32.3%)                             | 5,744 (28.6%)            | 15,034 (31.5%)       |
| <b>Income</b>                      |                                  |                                            |                          |                      | <b>Employment status</b>                    |                      |                                            |                          |                      |
| Lowest quartile                    | 2,645 (16.1%)                    | 24,582 (15.2%)                             | 3,197 (15.9%)            | 7,274 (15.2%)        | Employed                                    | 13,827 (83.9%)       | 138,876 (85.6%)                            | 16,607 (82.7%)           | 40,265 (84.2%)       |
| Low-middle quartile                | 4,525 (27.5%)                    | 41,965 (25.9%)                             | 5,950 (29.6%)            | 12,611 (26.4%)       | Unemployed                                  | 613 (3.7%)           | 5,638 (3.5%)                               | 848 (4.2%)               | 1,830 (3.8%)         |
| High-middle quartile               | 4,869 (29.6%)                    | 47,982 (29.6%)                             | 5,932 (29.5%)            | 14,249 (29.8%)       | Out of workforce                            | 1,382 (8.4%)         | 12,178 (7.5%)                              | 1,849 (9.2%)             | 3,891 (8.1%)         |
| Highest quartile                   | 4,361 (26.5%)                    | 46,757 (28.8%)                             | 13,379 (28.0%)           | 4,943 (24.6%)        | <b>SES</b>                                  |                      |                                            |                          |                      |
| <b>Employment status</b>           |                                  |                                            |                          |                      | Low                                         | 740 (4.5%)           | 6,737 (4.2%)                               | 1,098 (5.5%)             | 2,186 (4.6%)         |
| Employed                           | 12,106 (73.5%)                   | 122,979 (75.8%)                            | 14,006 (69.8%)           | 35,460 (74.2%)       | Medium                                      | 9,375 (56.9%)        | 88,331 (54.5%)                             | 11,658 (58.1%)           | 26,276 (55.0%)       |
| Unemployed                         | 880 (5.3%)                       | 8,223 (5.1%)                               | 1,222 (6.1%)             | 2,571 (5.4%)         | High                                        | 5,139 (31.2%)        | 55,871 (34.4%)                             | 5,952 (29.6%)            | 15,724 (32.9%)       |
| Out of workforce                   | 3,262 (19.8%)                    | 28,935 (17.8%)                             | 4,656 (23.2%)            | 9,049 (18.9%)        | <b>Parental health</b>                      |                      |                                            |                          |                      |
| <b>SES</b>                         |                                  |                                            |                          |                      | <b>Maternal MHC</b>                         | 6,454 (39.2%)        | 57,487 (35.4%)                             | 7,451 (37.1%)            | 18,182 (38.0%)       |
| Low                                | 1,115 (6.8%)                     | 9,750 (6.0%)                               | 1,635 (8.1%)             | 2,959 (6.2%)         | <b>Maternal substance use disorder</b>      | 549 (3.3%)           | 4,007 (2.5%)                               | 662 (3.3%)               | 1,335 (2.8%)         |
| Medium                             | 9,033 (54.8%)                    | 85,170 (52.5%)                             | 11,425 (56.9%)           | 25,501 (53.4%)       | <b>Maternal CCI score</b>                   |                      |                                            |                          |                      |
| High                               | 5,462 (33.2%)                    | 58,963 (36.4%)                             | 6,221 (31.0%)            | 16,794 (35.1%)       | One to Two                                  | 1,453 (8.8%)         | 10,360 (6.4%)                              | 1,676 (8.3%)             | 3,467 (7.3%)         |
| <b>Rural living</b>                | 6,297 (38.2%)                    | 55,221 (34.0%)                             | 8,112 (40.4%)            | 15,507 (32.4%)       | Three+                                      | 77 (0.5%)            | 481 (0.3%)                                 | 79 (0.4%)                | 153 (0.3%)           |
| <b>Married</b>                     | 9,694 (58.8%)                    | 98,594 (60.8%)                             | 12,661 (63.1%)           | 28,744 (60.1%)       | <b>Paternal MHC</b>                         | 4,321 (26.2%)        | 38,878 (24.0%)                             | 5,176 (25.8%)            | 12,276 (25.7%)       |
| <b>Dual-parent household</b>       | 14,755 (89.6%)                   | 147,424 (90.9%)                            | 11,734 (58.4%)           | 43,221 (90.4%)       | <b>Paternal substance use disorder</b>      | 774 (4.7%)           | 6,296 (3.9%)                               | 934 (4.7%)               | 2,058 (4.3%)         |
|                                    |                                  |                                            |                          |                      | <b>Paternal CCI score</b>                   |                      |                                            |                          |                      |
| <b>Paternal socioeconomic data</b> |                                  |                                            |                          |                      | One to Two                                  | 1,164 (7.1%)         | 10,302 (6.4%)                              | 1,412 (7.0%)             | 3,069 (6.4%)         |
| Age (years)                        | 34.9 ± 6.8                       | 34.7 ± 6.5                                 | 34.9 ± 6.5               | 34.8 ± 6.6           | Three+                                      | 71 (0.4%)            | 621 (0.4%)                                 | 90 (0.4%)                | 196 (0.4%)           |
| <b>Education</b>                   |                                  |                                            |                          |                      |                                             |                      |                                            |                          |                      |
| High school                        | 4,567 (27.7%)                    | 42,848 (26.4%)                             | 5,944 (29.6%)            | 12,974 (27.1%)       |                                             |                      |                                            |                          |                      |
| Technical school                   | 7,520 (45.7%)                    | 71,839 (44.3%)                             | 9,088 (45.3%)            | 21,218 (44.4%)       |                                             |                      |                                            |                          |                      |
| College degree                     | 3,358 (20.4%)                    | 38,020 (23.4%)                             | 3,964 (19.7%)            | 10,563 (22.1%)       |                                             |                      |                                            |                          |                      |

A composite socioeconomic status (SES) score was created based on parental education, income, and employment status in accordance with Jørgensen *et al.*<sup>32</sup> Data are presented as means ± standard deviation and n's (%).

Abbreviations: CCI = Charlson Comorbidity Index; CHD = congenital heart disease; MCA = major congenital anomaly; MHC = mental health condition; SES = socioeconomic status

Table S4. Incidence rates and aHRs of mental health conditions, demonstrating age-group-based differences within strata of sex and CHD complexity.

|                       | CHD cohort<br><i>n</i> =16,473<br>IR [95% CI] | General population cohort<br><i>n</i> =162,204<br>IR [95% CI] <i>aHR</i> [95% CI] |                         | Sibling cohort<br><i>n</i> =20,079<br>IR [95% CI] <i>aHR</i> [95% CI] |                         | MCA cohort<br><i>N</i> =47,799<br>IR [95% CI] <i>aHR</i> [95% CI] |                         |  |
|-----------------------|-----------------------------------------------|-----------------------------------------------------------------------------------|-------------------------|-----------------------------------------------------------------------|-------------------------|-------------------------------------------------------------------|-------------------------|--|
| <b>Sex</b>            |                                               |                                                                                   |                         |                                                                       |                         |                                                                   |                         |  |
| <b>Female</b>         | <b>20.71 [19.67-21.76]</b>                    | <b>13.17 [12.92-13.43]</b>                                                        | <b>1.57 [1.49-1.66]</b> | <b>15.29 [14.31-16.28]</b>                                            | <b>1.35 [1.18-1.54]</b> | <b>22.14 [21.49-22.78]</b>                                        | <b>0.92 [0.87-0.98]</b> |  |
| 0-<1y                 | 45.04 [39.02-51.06]                           | 9.28 [8.43-10.14]                                                                 | 4.94 [4.18-5.84]        | 6.41 [3.36-9.46]                                                      | 3.39 [1.57-7.34]        | 47.34 [43.64-51.04]                                               | 0.94 [0.79-1.11]        |  |
| 1-<3y                 | 22.91 [20.10-25.71]                           | 10.85 [10.26-11.45]                                                               | 2.05 [1.79-2.35]        | 10.28 [7.68-12.88]                                                    | 1.89 [1.16-3.08]        | 23.63 [21.95-25.32]                                               | 0.97 [0.84-1.13]        |  |
| 3-<5y                 | 9.97 [8.10-11.84]                             | 4.08 [3.71-4.45]                                                                  | 2.47 [1.99-3.06]        | 5.93 [4.16-7.71]                                                      | 1.32 [0.77-2.26]        | 12.78 [11.52-14.04]                                               | 0.78 [0.63-0.97]        |  |
| 5-<10y                | 12.40 [10.99-13.82]                           | 7.25 [6.92-7.58]                                                                  | 1.68 [1.48-1.90]        | 8.20 [6.95-9.45]                                                      | 1.31 [0.99-1.75]        | 12.82 [11.96-13.68]                                               | 0.97 [0.84-1.11]        |  |
| 10-<18y               | 28.38 [26.18-30.57]                           | 25.50 [24.86-26.13]                                                               | 1.10 [1.01-1.20]        | 25.80 [23.81-27.79]                                                   | 1.22 [1.03-1.45]        | 30.54 [29.17-31.91]                                               | 0.92 [0.83-1.01]        |  |
| <b>Male</b>           | <b>24.66 [23.52-25.80]</b>                    | <b>14.23 [13.97-14.49]</b>                                                        | <b>1.71 [1.63-1.80]</b> | <b>15.75 [14.81-16.69]</b>                                            | <b>1.41 [1.25-1.60]</b> | <b>21.75 [21.13-22.38]</b>                                        | <b>1.12 [1.06-1.19]</b> |  |
| 0-<1y                 | 46.76 [40.83-52.69]                           | 9.27 [8.45-10.10]                                                                 | 4.91 [4.19-5.76]        | 7.38 [4.30-10.47]                                                     | 3.15 [1.60-6.17]        | 32.45 [29.52-35.38]                                               | 1.39 [1.17-1.64]        |  |
| 1-<3y                 | 28.23 [25.16-31.29]                           | 13.73 [13.07-14.39]                                                               | 1.98 [1.75-2.23]        | 14.39 [11.48-17.30]                                                   | 2.07 [1.34-3.20]        | 23.56 [21.94-25.18]                                               | 1.16 [1.02-1.33]        |  |
| 3-<5y                 | 17.36 [14.91-19.81]                           | 8.26 [7.74-8.77]                                                                  | 2.04 [1.74-2.39]        | 6.64 [4.85-8.43]                                                      | 2.56 [1.56-4.21]        | 14.17 [12.88-15.45]                                               | 1.19 [1.00-1.42]        |  |
| 5-<10y                | 21.87 [19.97-23.76]                           | 14.73 [14.26-15.21]                                                               | 1.46 [1.33-1.60]        | 14.95 [13.35-16.55]                                                   | 1.20 [0.97-1.48]        | 22.01 [20.90-23.12]                                               | 0.97 [0.87-1.08]        |  |
| 10-<18y               | 24.31 [22.24-26.38]                           | 18.02 [17.48-18.56]                                                               | 1.34 [1.22-1.47]        | 20.16 [18.50-21.82]                                                   | 1.25 [1.04-1.50]        | 22.01 [20.85-23.17]                                               | 1.13 [1.01-1.26]        |  |
| <b>CHD complexity</b> |                                               |                                                                                   |                         |                                                                       |                         |                                                                   |                         |  |
| <b>Mild/Moderate</b>  | <b>21.95 [21.07-22.83]</b>                    | <b>13.52 [13.30-13.73]</b>                                                        | <b>1.60 [1.53-1.68]</b> | <b>15.54 [14.83-16.24]</b>                                            | <b>1.38 [1.26-1.52]</b> | <b>21.92 [21.40-22.45]</b>                                        | <b>0.99 [0.94-1.04]</b> |  |
| 0-<1y                 | 45.87 [41.03-50.71]                           | 9.60 [8.91-10.30]                                                                 | 4.62 [4.05-5.26]        | 8.54 [6.12-10.96]                                                     | 4.03 [2.39-6.79]        | 39.19 [36.52-41.86]                                               | 1.11 [0.97-1.27]        |  |
| 1-<3y                 | 23.86 [21.57-26.15]                           | 12.16 [11.65-12.66]                                                               | 1.90 [1.71-2.11]        | 11.91 [9.97-13.85]                                                    | 2.26 [1.64-3.11]        | 23.62 [22.29-24.96]                                               | 1.01 [0.90-1.13]        |  |
| 3-<5y                 | 13.14 [11.41-14.88]                           | 6.09 [5.73-6.45]                                                                  | 2.12 [1.83-2.46]        | 7.14 [5.79-8.48]                                                      | 1.60 [1.13-2.28]        | 13.64 [12.60-14.68]                                               | 0.94 [0.81-1.11]        |  |
| 5-<10y                | 16.69 [15.34-18.04]                           | 10.98 [10.64-11.31]                                                               | 1.50 [1.37-1.64]        | 12.47 [11.39-13.55]                                                   | 1.22 [1.02-1.45]        | 17.49 [16.67-18.32]                                               | 0.96 [0.87-1.06]        |  |
| 10-<18y               | 25.80 [24.02-27.58]                           | 21.95 [21.44-22.45]                                                               | 1.15 [1.07-1.24]        | 22.59 [21.24-23.94]                                                   | 1.23 [1.08-1.41]        | 26.47 [25.38-27.55]                                               | 0.97 [0.89-1.06]        |  |
| <b>Severe/SV</b>      | <b>28.39 [25.29-31.49]</b>                    | <b>13.44 [12.82-14.06]</b>                                                        | <b>2.21 [1.96-2.51]</b> | <b>14.24 [12.31-16.16]</b>                                            | <b>2.25 [1.67-3.03]</b> | <b>21.29 [19.79-22.80]</b>                                        | <b>1.31 [1.14-1.51]</b> |  |
| 0-<1y                 | 56.84 [42.21-71.47]                           | 8.27 [6.54-10.00]                                                                 | 8.11 [5.67-11.59]       | 7.29 [0.90-13.67]                                                     | 8.43 [1.92-37.04]       | 49.00 [40.85-57.15]                                               | 1.21 [0.87-1.68]        |  |
| 1-<3y                 | 32.93 [25.04-40.81]                           | 14.59 [13.02-16.17]                                                               | 2.25 [1.71-2.94]        | 7.35 [3.01-11.69]                                                     | 46.74 [3.78-578.27]     | 21.72 [18.07-25.37]                                               | 1.42 [1.04-1.94]        |  |
| 3-<5y                 | 19.15 [12.81-25.50]                           | 6.25 [5.18-7.33]                                                                  | 3.08 [2.07-4.58]        | 6.87 [3.14-10.60]                                                     | 2.14 [0.79-5.79]        | 10.51 [7.85-13.16]                                                | 2.15 [1.31-3.52]        |  |
| 5-<10y                | 19.68 [15.04-24.32]                           | 10.61 [9.63-11.59]                                                                | 1.83 [1.41-2.38]        | 10.68 [7.83-13.53]                                                    | 1.81 [1.08-3.05]        | 19.10 [16.56-21.65]                                               | 0.98 [0.73-1.31]        |  |
| 10-<18y               | 31.50 [25.09-37.90]                           | 21.31 [19.84-22.78]                                                               | 1.51 [1.21-1.89]        | 22.61 [18.67-26.54]                                                   | 1.71 [1.09-2.69]        | 21.82 [18.90-24.74]                                               | 1.59 [1.20-2.11]        |  |

Incidence rates [95% CIs] and adjusted hazard ratios (aHRs [95% CI]) of mental health conditions for the CHD, general population, sibling, and MCA cohorts, stratified by CHD complexity and sex. These subcohorts were further stratified by age group to evaluate differences across ages of children. Mental health conditions were defined as a composite outcome of the first medical contact yielding an associated ICD-10 diagnosis, prescription of a psychotropic medication, or provision of psychotherapy. Incidence rates are reported as mental health condition diagnoses per 1,000 person-years. The CHD cohort vs. the general population

cohort and the CHD cohort vs. the MCA cohort analyses were adjusted by design for sex and year of CHD diagnosis as a result of matching and further adjusted for immigration status, mother's marital status, socioeconomic status, rurality, maternal and paternal mental health, and maternal and paternal physical health as determined by the Charlson Comorbidity Index; the CHD cohort vs. the sibling cohort analysis was adjusted for sex and calendar year.

Abbreviations: *CHD* = congenital heart disease; *CI* = confidence interval; *MCA* = major congenital anomaly; *SV* = single ventricle

Table S5. Incidence rates and aHRs of specific hospital-based mental health diagnoses, stratified by age group, sex, and CHD complexity.

|                       | CHD cohort<br><i>n</i> =16,473 | General population cohort<br><i>n</i> =162,204 |                    | Sibling cohort<br><i>N</i> =20,079 |                     | MCA cohort<br><i>n</i> =47,799 |                  |
|-----------------------|--------------------------------|------------------------------------------------|--------------------|------------------------------------|---------------------|--------------------------------|------------------|
|                       | IR [95% CI]                    | IR [95% CI]                                    | aHR [95% CI]       | IR [95% CI]                        | aHR [95% CI]        | IR [95% CI]                    | aHR [95% CI]     |
| <b>Overall</b>        | 14.23 [13.63-14.82]            | 7.70 [7.56-7.83]                               | 1.83 [1.74-1.91]   | 9.61 [9.15-10.07]                  | 1.50 [1.37-1.65]    | 13.54 [13.20-13.88]            | 1.03 [0.97-1.08] |
| 0-<1y                 | 33.27 [29.68-36.86]            | 3.57 [3.20-3.93]                               | 9.25 [7.91-10.81]  | 5.30 [3.66-6.95]                   | 4.81 [2.70-8.56]    | 24.80 [22.95-26.65]            | 1.31 [1.13-1.52] |
| 1-<3y                 | 9.14 [7.92-10.36]              | 2.40 [2.20-2.59]                               | 3.77 [3.21-4.44]   | 2.09 [1.40-2.78]                   | 8.79 [4.35-17.75]   | 8.20 [7.52-8.87]               | 1.13 [0.96-1.34] |
| 3-<5y                 | 10.01 [8.72-11.31]             | 3.92 [3.66-4.17]                               | 2.50 [2.15-2.89]   | 4.60 [3.69-5.52]                   | 1.90 [1.33-2.71]    | 9.54 [8.80-10.28]              | 1.02 [0.87-1.19] |
| 5-<10y                | 12.85 [11.85-13.85]            | 7.73 [7.49-7.96]                               | 1.63 [1.50-1.78]   | 9.00 [8.22-9.77]                   | 1.38 [1.16-1.63]    | 13.54 [12.93-14.14]            | 0.93 [0.85-1.02] |
| 10-<18y               | 16.19 [15.06-17.33]            | 12.76 [12.45-13.07]                            | 1.24 [1.15-1.34]   | 13.86 [12.99-14.72]                | 1.28 [1.13-1.46]    | 15.88 [15.21-16.55]            | 1.00 [0.92-1.09] |
| <b>Sex</b>            |                                |                                                |                    |                                    |                     |                                |                  |
| <b>Female</b>         | 12.44 [11.65-13.23]            | 6.76 [6.58-6.94]                               | 1.81 [1.69-1.94]   | 8.33 [7.61-9.04]                   | 1.50 [1.27-1.77]    | 13.09 [12.60-13.57]            | 0.92 [0.85-0.99] |
| 0-<1y                 | 32.14 [27.06-37.21]            | 3.69 [3.15-4.23]                               | 8.92 [7.11-11.19]  | 4.90 [2.24-7.56]                   | 2.93 [1.26-6.78]    | 30.18 [27.23-33.13]            | 1.07 [0.87-1.32] |
| 1-<3y                 | 8.53 [6.84-10.22]              | 1.96 [1.70-2.21]                               | 4.49 [3.50-5.75]   | 2.03 [0.88-3.18]                   | 3.21 [1.14-8.99]    | 7.85 [6.89-8.80]               | 1.12 [0.88-1.42] |
| 3-<5y                 | 7.15 [5.59-8.71]               | 2.07 [1.81-2.33]                               | 3.59 [2.77-4.65]   | 3.26 [1.95-4.56]                   | 1.46 [0.73-2.93]    | 9.21 [8.16-10.25]              | 0.73 [0.56-0.94] |
| 5-<10y                | 8.25 [7.12-9.38]               | 4.35 [4.10-4.60]                               | 1.86 [1.60-2.17]   | 5.75 [4.71-6.79]                   | 1.30 [0.94-1.81]    | 9.60 [8.87-10.33]              | 0.85 [0.72-1.00] |
| 10-<18y               | 17.06 [15.43-18.69]            | 14.07 [13.61-14.52]                            | 1.17 [1.06-1.30]   | 13.53 [12.12-14.93]                | 1.44 [1.17-1.79]    | 17.68 [16.68-18.68]            | 0.94 [0.83-1.06] |
| <b>Male</b>           | 16.01 [15.12-16.91]            | 8.62 [8.42-8.83]                               | 1.84 [1.73-1.96]   | 10.72 [9.95-11.49]                 | 1.43 [1.24-1.65]    | 13.97 [13.49-14.46]            | 1.13 [1.05-1.21] |
| 0-<1y                 | 34.32 [29.25-39.39]            | 3.45 [2.95-3.95]                               | 9.78 [7.87-12.15]  | 4.02 [1.75-6.30]                   | 4.97 [1.97-12.55]   | 19.88 [17.59-22.16]            | 1.68 [1.37-2.08] |
| 1-<3y                 | 9.72 [7.95-11.49]              | 2.82 [2.52-3.11]                               | 3.36 [2.70-4.18]   | 2.26 [1.12-3.41]                   | 11.83 [3.42-40.96]  | 8.52 [7.56-9.48]               | 1.21 [0.96-1.52] |
| 3-<5y                 | 12.80 [10.74-14.85]            | 5.70 [5.27-6.12]                               | 2.14 [1.78-2.56]   | 4.90 [3.38-6.42]                   | 1.99 [1.15-3.45]    | 9.85 [8.80-10.89]              | 1.32 [1.08-1.62] |
| 5-<10y                | 17.46 [15.81-19.11]            | 11.06 [10.66-11.47]                            | 1.54 [1.39-1.71]   | 11.65 [10.26-13.05]                | 1.32 [1.05-1.65]    | 17.30 [16.35-18.26]            | 0.98 [0.87-1.10] |
| 10-<18y               | 15.30 [13.72-16.87]            | 11.42 [11.01-11.84]                            | 1.34 [1.20-1.50]   | 14.21 [12.85-15.58]                | 1.18 [0.96-1.46]    | 14.09 [13.20-14.98]            | 1.09 [0.96-1.24] |
| <b>CHD complexity</b> |                                |                                                |                    |                                    |                     |                                |                  |
| <b>Mild/Moderate</b>  | 13.94 [13.26-14.63]            | 7.63 [7.47-7.78]                               | 1.80 [1.71-1.90]   | 9.57 [9.03-10.11]                  | 1.52 [1.36-1.70]    | 13.55 [13.15-13.95]            | 1.01 [0.95-1.07] |
| 0-<1y                 | 33.53 [29.40-37.66]            | 3.66 [3.23-4.08]                               | 8.85 [7.40-10.57]  | 5.33 [3.42-7.24]                   | 4.66 [2.34-9.25]    | 24.70 [22.59-26.82]            | 1.30 [1.10-1.54] |
| 1-<3y                 | 8.21 [6.89-9.53]               | 2.31 [2.09-2.53]                               | 3.48 [2.87-4.23]   | 1.94 [1.17-2.72]                   | 7.45 [3.39-16.38]   | 8.33 [7.55-9.11]               | 1.00 [0.82-1.21] |
| 3-<5y                 | 9.66 [8.21-11.12]              | 3.96 [3.67-4.25]                               | 2.36 [1.99-2.80]   | 4.61 [3.54-5.68]                   | 2.19 [1.43-3.36]    | 9.72 [8.86-10.58]              | 0.96 [0.80-1.16] |
| 5-<10y                | 12.49 [11.35-13.63]            | 7.82 [7.54-8.09]                               | 1.57 [1.42-1.74]   | 9.09 [8.18-10.01]                  | 1.25 [1.02-1.52]    | 13.45 [12.75-14.15]            | 0.92 [0.82-1.02] |
| 10-<18y               | 16.42 [15.06-17.79]            | 12.93 [12.56-13.31]                            | 1.24 [1.13-1.36]   | 13.89 [12.85-14.93]                | 1.38 [1.18-1.62]    | 16.11 [15.29-16.92]            | 1.00 [0.90-1.12] |
| <b>Severe/SV</b>      | 18.87 [16.42-21.32]            | 7.39 [6.94-7.84]                               | 2.67 [2.30-3.11]   | 8.01 [6.58-9.43]                   | 2.56 [1.79-3.66]    | 13.27 [12.12-14.43]            | 1.35 [1.14-1.59] |
| 0-<1y                 | 41.97 [29.43-54.52]            | 3.29 [2.20-4.38]                               | 16.23 [9.67-27.23] | 2.91 [-1.12-6.95]                  | 23.55 [1.43-386.76] | 28.71 [22.49-34.92]            | 1.55 [1.02-2.35] |
| 1-<3y                 | 16.12 [10.70-21.54]            | 2.87 [2.18-3.56]                               | 6.91 [4.37-10.93]  | 3.98 [0.79-7.16]                   | 43.98 [2.87-672.83] | 7.40 [5.31-9.49]               | 2.15 [1.32-3.50] |
| 3-<5y                 | 12.55 [7.53-17.57]             | 4.11 [3.25-4.97]                               | 2.96 [1.84-4.77]   | 4.18 [1.28-7.07]                   | 5.68 [0.99-32.56]   | 7.01 [4.89-9.13]               | 1.63 [0.92-2.88] |
| 5-<10y                | 16.63 [12.49-20.77]            | 7.49 [6.68-8.30]                               | 2.17 [1.63-2.89]   | 7.00 [4.72-9.29]                   | 1.97 [1.09-3.56]    | 15.27 [13.06-17.48]            | 0.99 [0.72-1.36] |
| 10-<18y               | 19.63 [14.86-24.40]            | 12.62 [11.53-13.71]                            | 1.59 [1.21-2.07]   | 11.77 [8.99-14.55]                 | 1.70 [0.98-2.96]    | 13.99 [11.75-16.23]            | 1.42 [1.02-1.98] |



Incidence rates and adjusted hazard ratios with 95% confidence intervals (CIs) of specific hospital-based mental health diagnoses for the CHD, general population, sibling, and MCA cohorts, stratified by CHD complexity and sex. These subcohorts were further stratified by age group to evaluate differences across ages of children. Incidence rates are reported as hospital-based mental health diagnoses per 1,000 person-years. The CHD cohort vs. the general population cohort and the CHD cohort vs. the MCA cohort analyses were adjusted by design for sex and year of CHD diagnosis as a result of matching and further adjusted for immigration status, mother's marital status, socioeconomic status, rurality, maternal and paternal mental health, and maternal and paternal physical health as determined by the Charlson Comorbidity Index; the CHD cohort vs. the sibling cohort analysis was adjusted for sex and calendar year.

Abbreviations: *aHR* = adjusted hazard ratios; *CHD* = congenital heart disease; *CI* = confidence interval; *IR* = incidence rate; *MCA* = major congenital anomaly; *SV* = single ventricle

**Table S6. Incidence rates and aHRs of specific hospital-based mental health diagnoses, by cohort.**

| Diagnosis                                       | ICD-10 codes                   | CHD cohort          | General population cohort |                  | Sibling cohort    |                   | MCA cohort          |                  |
|-------------------------------------------------|--------------------------------|---------------------|---------------------------|------------------|-------------------|-------------------|---------------------|------------------|
|                                                 |                                | IR [95% CI]         | IR [95% CI]               | aHR [95% CI]     | IR [95% CI]       | aHR [95% CI]      | IR [95% CI]         | aHR [95% CI]     |
| Any mental diagnosis                            |                                | 14.23 [13.63-14.82] | 7.70 [7.56-7.83]          | 1.83 [1.74-1.91] | 9.61 [9.15-10.07] | 1.50 [1.37-1.65]  | 13.54 [13.20-13.88] | 1.03 [0.97-1.08] |
| Organic mental disorders                        | F00-F09                        | 0.06 [0.02-0.10]    | 0.02 [0.01-0.03]          | 3.00 [1.41-6.35] | 0.03 [0.00-0.05]  | 1.61 [0.38-6.72]  | 0.04 [0.02-0.06]    | 1.40 [0.58-3.38] |
| Substance use disorders                         | F10-F19                        | 0.67 [0.55-0.79]    | 0.53 [0.50-0.57]          | 1.21 [0.99-1.47] | 0.92 [0.78-1.06]  | 1.01 [0.74-1.38]  | 0.53 [0.46-0.59]    | 1.25 [0.98-1.58] |
| Schizophrenia spectrum disorders                | F20-F29                        | 0.28 [0.20-0.36]    | 0.23 [0.21-0.25]          | 1.22 [0.89-1.66] | 0.35 [0.26-0.43]  | 1.00 [0.61-1.62]  | 0.37 [0.31-0.42]    | 0.75 [0.53-1.05] |
| Mood disorders                                  | F30-F39                        | 0.63 [0.51-0.75]    | 0.61 [0.57-0.65]          | 1.03 [0.84-1.27] | 0.73 [0.61-0.86]  | 1.23 [0.87-1.75]  | 0.63 [0.56-0.70]    | 1.01 [0.80-1.27] |
| Depression                                      | F32-F33                        | 0.57 [0.46-0.69]    | 0.58 [0.54-0.61]          | 1.00 [0.81-1.23] | 0.65 [0.54-0.77]  | 1.18 [0.81-1.70]  | 0.58 [0.52-0.65]    | 0.99 [0.78-1.27] |
| Anxiety disorders                               | F40-F48                        | 4.41 [4.09-4.73]    | 2.46 [2.39-2.54]          | 1.75 [1.61-1.90] | 3.21 [2.95-3.47]  | 1.55 [1.32-1.82]  | 3.65 [3.48-3.82]    | 1.14 [1.04-1.25] |
| Anxiety                                         | F41                            | 0.57 [0.46-0.69]    | 0.48 [0.45-0.52]          | 1.15 [0.93-1.43] | 0.50 [0.40-0.60]  | 1.93 [1.23-3.03]  | 0.52 [0.45-0.58]    | 1.11 [0.87-1.43] |
| Severe stress reaction                          | F43                            | 3.43 [3.15-3.71]    | 1.73 [1.66-1.79]          | 1.95 [1.78-2.14] | 2.37 [2.14-2.59]  | 1.51 [1.25-1.81]  | 2.74 [2.59-2.89]    | 1.17 [1.06-1.30] |
| Eating Disorders                                | F50                            | 0.96 [0.81-1.10]    | 0.43 [0.40-0.46]          | 2.28 [1.91-2.71] | 0.54 [0.43-0.64]  | 1.58 [1.07-2.32]  | 0.74 [0.67-0.82]    | 1.28 [1.05-1.56] |
| Anorexia Nervosa                                | F50.0                          | 0.15 [0.09-0.21]    | 0.15 [0.14-0.17]          | 0.98 [0.65-1.49] | 0.19 [0.13-0.26]  | 0.64 [0.28-1.42]  | 0.13 [0.10-0.17]    | 1.37 [0.81-2.30] |
| Personality disorders                           | F60                            | 0.20 [0.13-0.26]    | 0.15 [0.13-0.17]          | 1.25 [0.85-1.82] | 0.26 [0.19-0.33]  | 1.11 [0.59-2.11]  | 0.15 [0.12-0.19]    | 1.37 [0.86-2.21] |
| Intellectual disability                         | F70-F79                        | 2.95 [2.69-3.21]    | 0.60 [0.56-0.63]          | 4.98 [4.44-5.57] | 0.72 [0.59-0.84]  | 4.42 [3.34-5.85]  | 3.32 [3.15-3.48]    | 0.90 [0.81-1.00] |
| Mild intellectual disability                    | F70                            | 1.06 [0.90-1.21]    | 0.36 [0.33-0.39]          | 2.83 [2.38-3.37] | 0.47 [0.37-0.57]  | 2.18 [1.53-3.12]  | 1.19 [1.09-1.29]    | 0.88 [0.74-1.05] |
| Moderate intellectual disability                | F71                            | 0.65 [0.53-0.77]    | 0.10 [0.08-0.11]          | 7.23 [5.58-9.36] | 0.09 [0.05-0.13]  | 8.82 [4.30-18.12] | 0.65 [0.58-0.73]    | 1.03 [0.82-1.29] |
| Developmental disorders                         | F80-84                         | 4.48 [4.15-4.80]    | 2.57 [2.49-2.64]          | 1.72 [1.58-1.86] | 2.72 [2.48-2.96]  | 1.61 [1.36-1.92]  | 4.78 [4.58-4.98]    | 0.92 [0.84-1.00] |
| Autism spectrum disorders                       | F84.x, excluding<br>F84.2-84.4 | 2.64 [2.39-2.89]    | 1.72 [1.65-1.78]          | 1.54 [1.39-1.70] | 1.69 [1.50-1.88]  | 1.37 [1.11-1.70]  | 2.98 [2.82-3.14]    | 0.88 [0.79-0.98] |
| Behavior, attention, and<br>emotional disorders | F90-F99                        | 5.86 [5.49-6.23]    | 3.87 [3.77-3.96]          | 1.46 [1.36-1.56] | 4.74 [4.42-5.06]  | 1.25 [1.09-1.43]  | 5.80 [5.58-6.02]    | 0.98 [0.91-1.06] |
| ADHD                                            | F90 and F98.8                  | 3.22 [2.94-3.49]    | 2.33 [2.26-2.41]          | 1.32 [1.21-1.45] | 2.85 [2.60-3.10]  | 1.30 [1.09-1.55]  | 3.47 [3.30-3.64]    | 0.89 [0.80-0.99] |
| Attachment disorders                            | F94.x excluding<br>F94.0       | 0.47 [0.36-0.57]    | 0.29 [0.26-0.32]          | 1.48 [1.13-1.93] | 0.42 [0.32-0.51]  | 1.23 [0.78-1.94]  | 0.43 [0.38-0.49]    | 1.15 [0.84-1.58] |
| Tic disorders                                   | F95                            | 0.73 [0.60-0.86]    | 0.46 [0.42-0.49]          | 1.57 [1.29-1.90] | 0.53 [0.42-0.63]  | 1.27 [0.85-1.88]  | 0.53 [0.46-0.59]    | 1.35 [1.07-1.70] |
| Self-harm or suicidal history                   | R45.8, T14.91,<br>X60-84       | 0.11 [0.06-0.16]    | 0.15 [0.13-0.17]          | 0.73 [0.45-1.20] | 0.24 [0.17-0.31]  | 0.46 [0.17-1.27]  | 0.17 [0.13-0.21]    | 0.57 [0.32-1.01] |

Incidence rates and adjusted hazard ratios with 95% confidence intervals (CIs) of specific hospital-based mental health diagnoses in the CHD population compared to the general population, sibling, and MCA cohorts. The CHD cohort vs. the general population cohort and the CHD vs. the MCA cohort analyses were adjusted by design for sex and year of CHD diagnosis as a result of matching and further adjusted for immigration status, mother's marital status, socioeconomic status, rurality, maternal and paternal mental health, and maternal and paternal physical health as determined by the Charlson Comorbidity Index; the CHD cohort vs. the sibling cohort analysis was adjusted for sex and calendar year. N/A signifies incidence rates and hazard ratios that could not be calculated due to inadequate number of outcomes.

Abbreviations: *ADHD* = attention-deficit/hyperactivity disorder; *aHR* = adjusted hazard ratio; *CD* = conduct disorder; *CHD* = congenital heart disease; *IR* = incidence rate; *MCA* = major congenital anomaly; *ODD* = oppositional defiant disorder

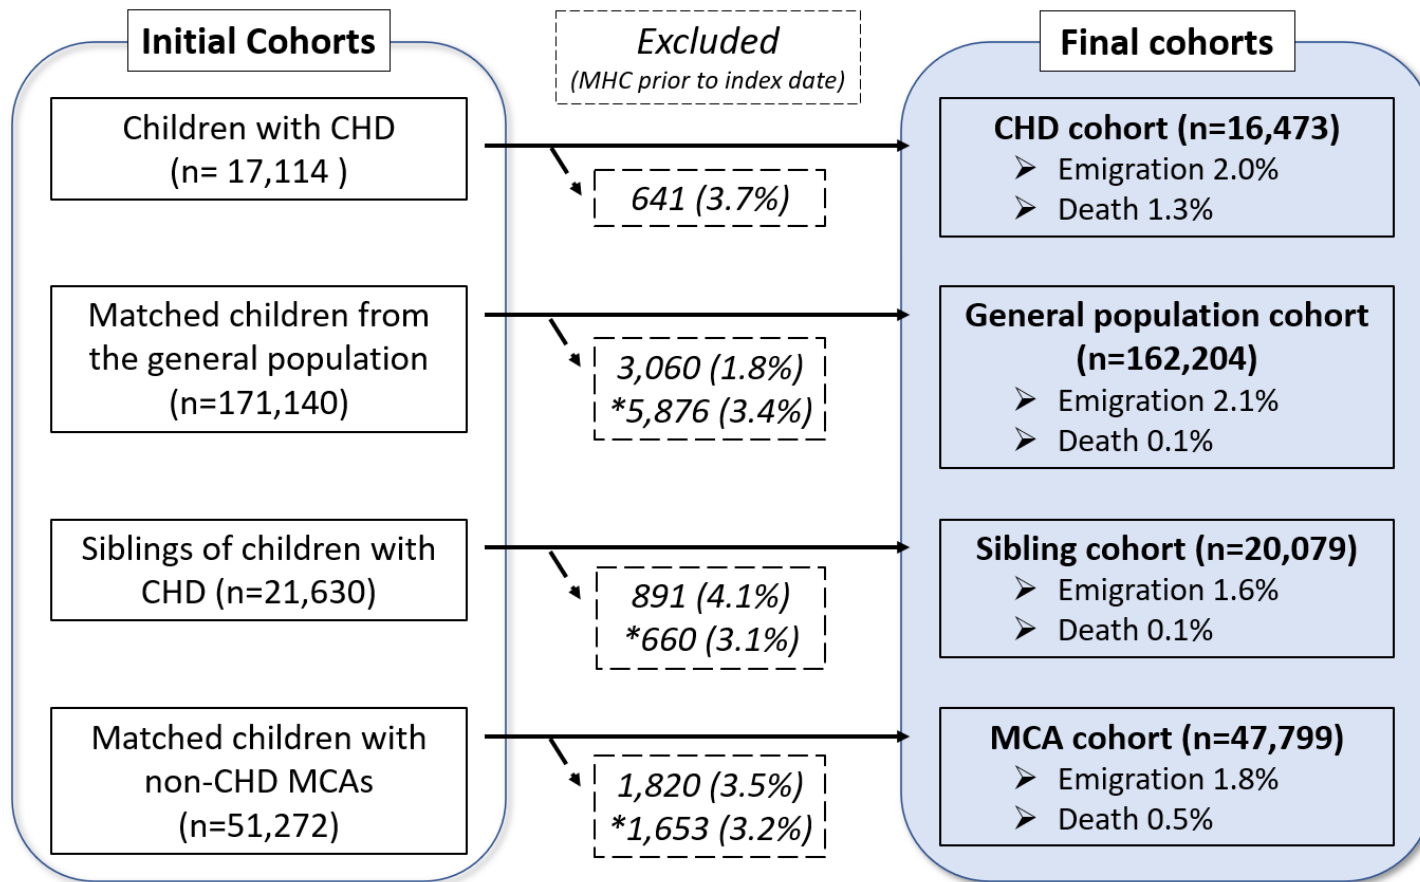

**Figure S1. Flow diagram of the CHD and comparison cohorts.** Children diagnosed with CHD during 1996-2017 were included in the CHD cohort. The comparison cohorts consisted of children from the general population (matched 10:1 by age and sex), siblings of children with CHD, and children with non-CHD MCAs (matched 3:1 by age and sex). Children were excluded from the comparison cohorts if they had a history of a mental health condition prior to the index date or \*if their matched CHD patient was excluded due to history of a mental health condition. The final cohorts as depicted on the right. The number of children who died or were lost to follow-up due to emigration during the study period are specified for each cohort.

Abbreviations: *CHD* = congenital heart disease; *MCA* = major congenital anomalies.

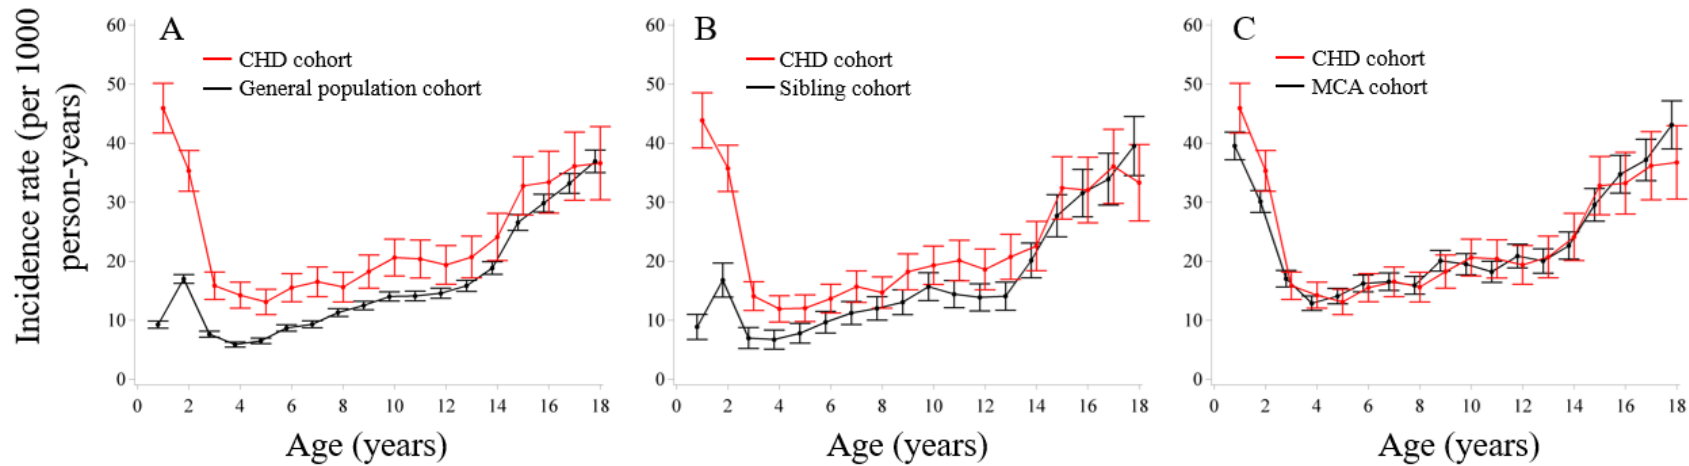

**Figure S2. Incidence rates of mental health conditions in the CHD cohort compared to the general population (A), sibling (B), and MCA cohorts (C).**

Mental health conditions were defined as a composite outcome of the first medical contact yielding an associated ICD-10 diagnosis, prescription of a psychotropic medication, or provision of psychotherapy. Incidence rates and 95% CIs are graphed in one-year intervals of age.

Abbreviations: *CHD* = congenital heart disease; *MCA* = major congenital anomalies.

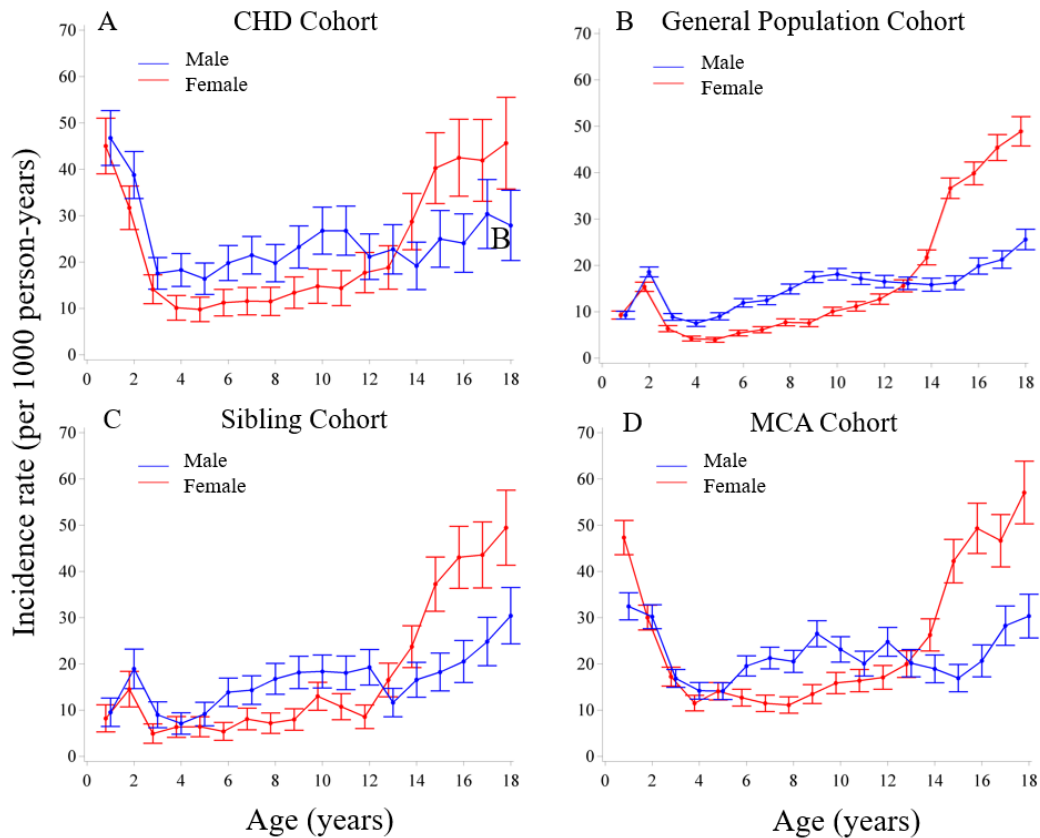

**Figure S3. Incidence rates of mental health conditions in the CHD cohort (A) compared to the general population (B), sibling (C), and MCA cohorts (D), stratified by sex.** Mental health conditions were defined as a composite outcome of the first medical contact yielding an associated ICD-10 diagnosis, prescription of a psychotropic medication, or provision of psychotherapy. Incidence rates and 95% CIs for females (red) and males (blue) are graphed in one-year intervals of age.

Abbreviations: *CHD* = congenital heart disease; *MCA* = major congenital anomalies.

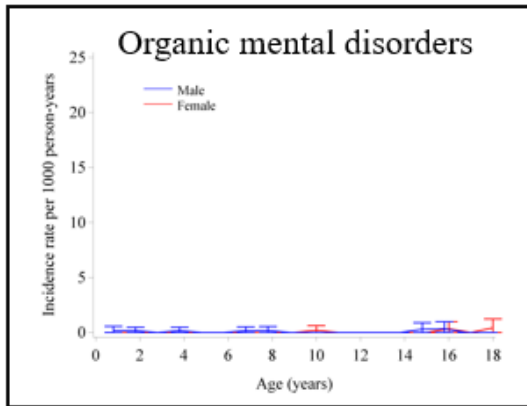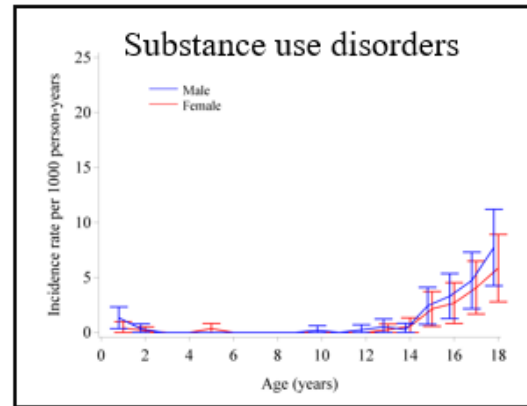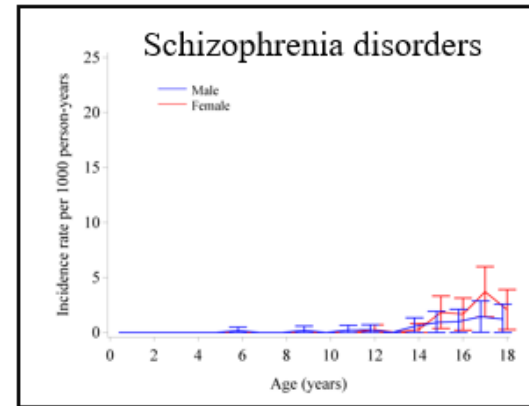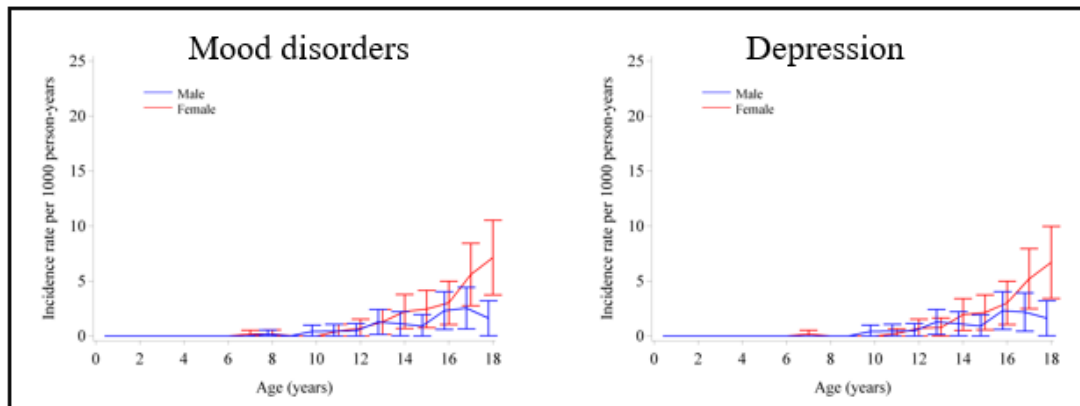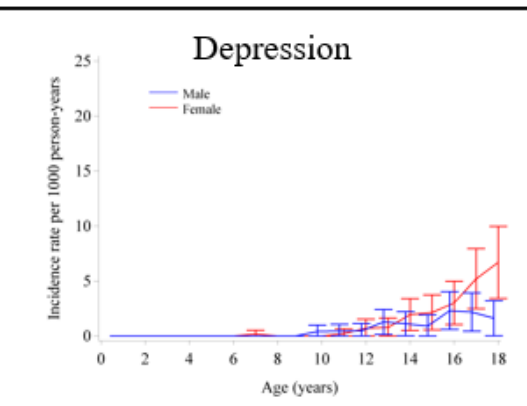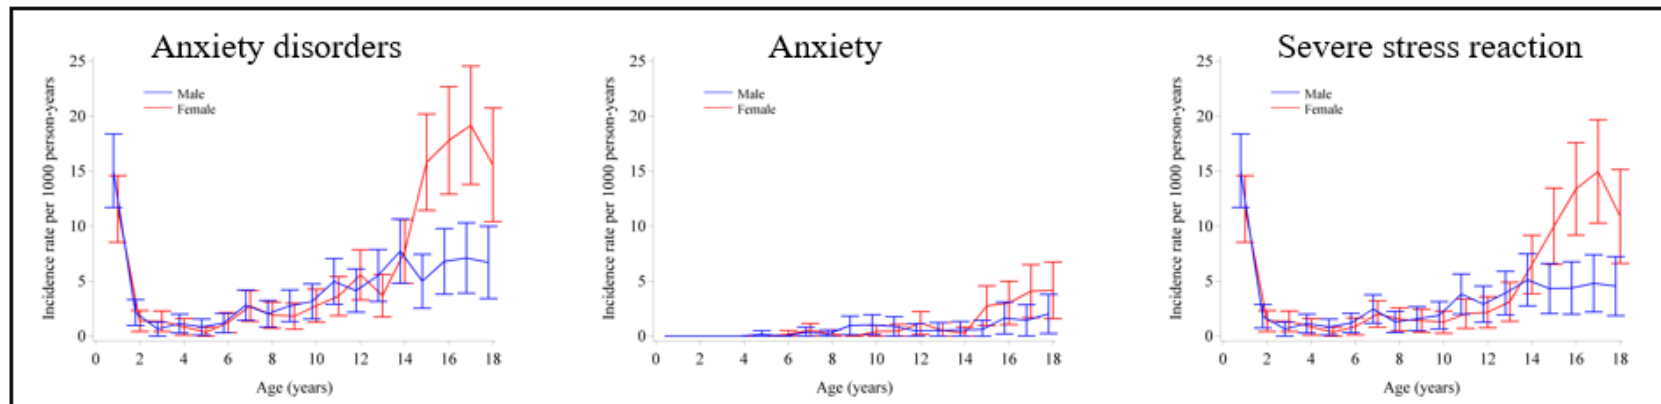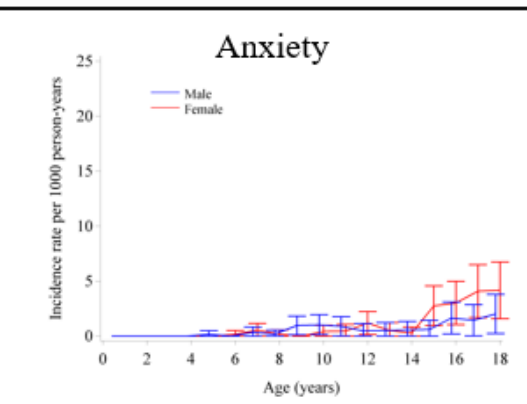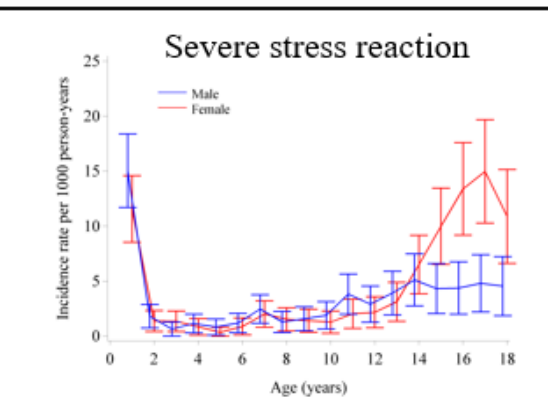

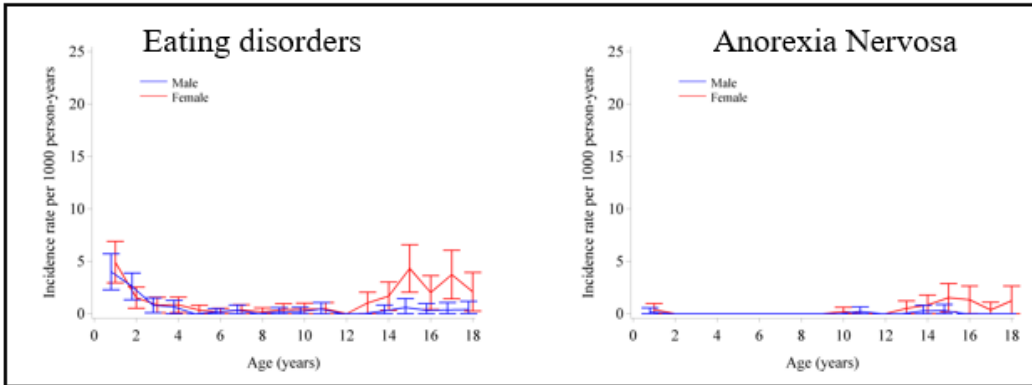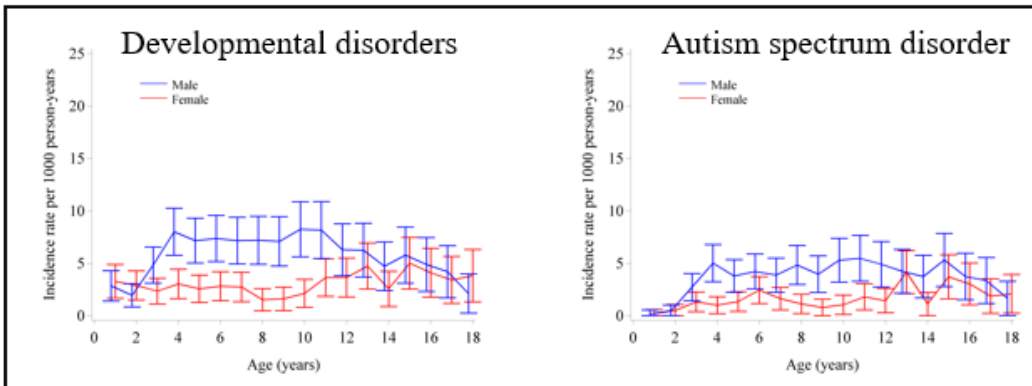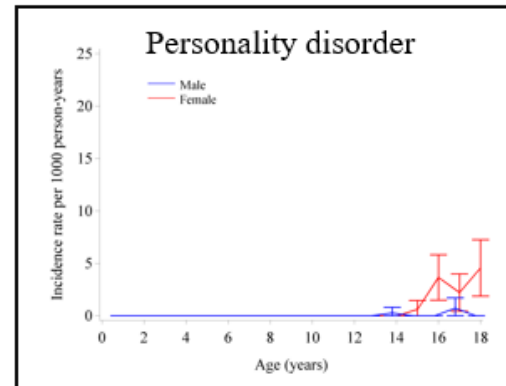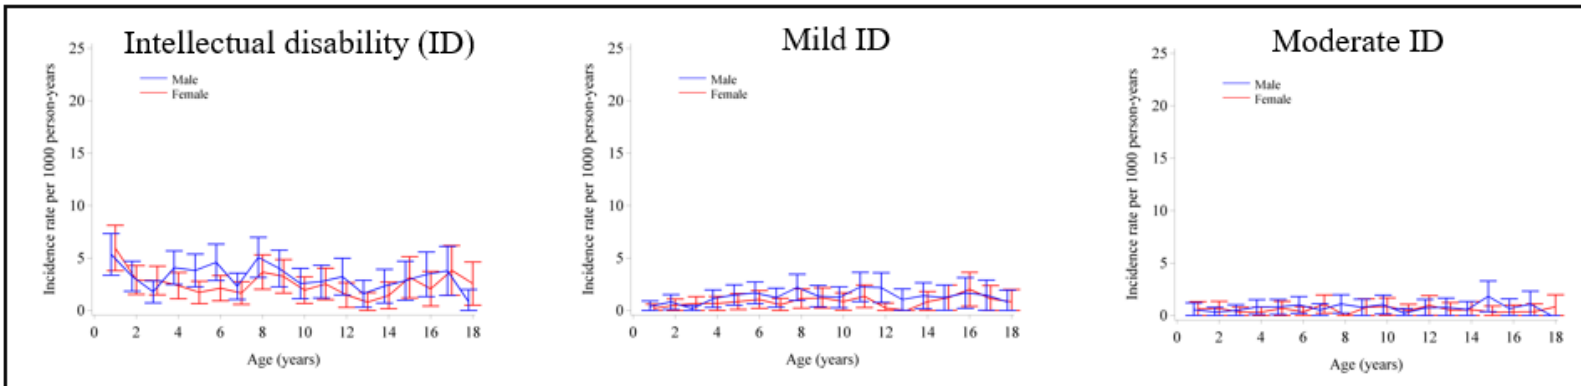

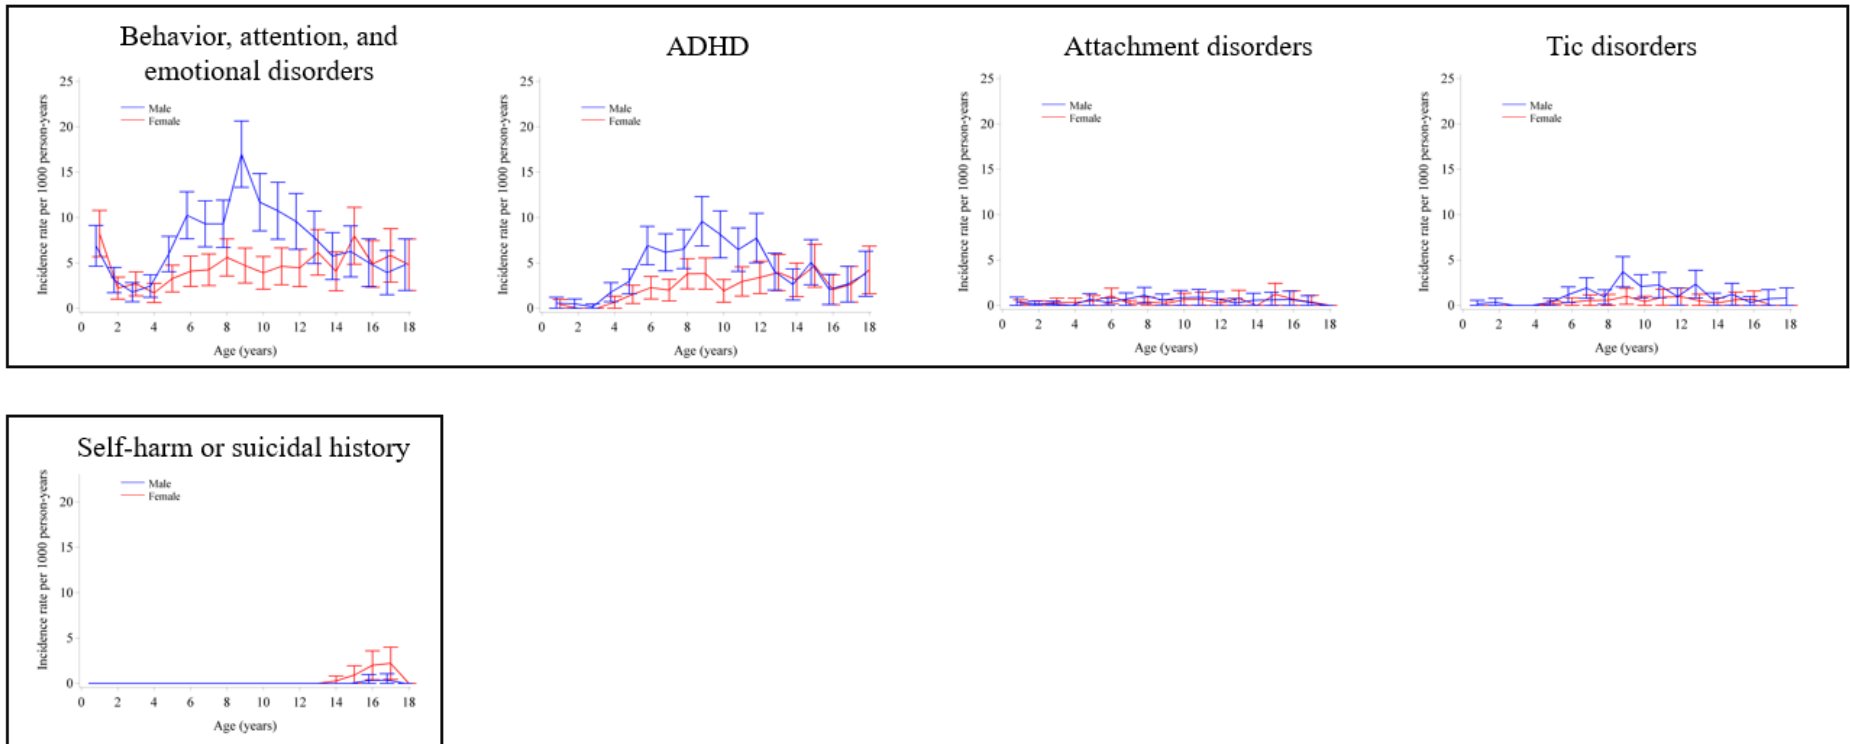

**Figure S4. Incidence rates of hospital-based mental health diagnostic groups and specific diagnoses in the CHD cohort, stratified by sex.** In each box, the incidence rate graphs for each diagnostic group are presented in addition to specific diagnoses within the group. Incidence rates and 95% CIs for females (red) and males (blue) are graphed in one-year intervals of age.

Abbreviations: *ADHD* = attention deficit/hyperactivity disorder; *ASD* = autism spectrum disorder; *CHD* = congenital heart disease
